# Supplementary material
Source: PubMed Central journal article supplement (PMC7642335)
Supplement: mmc1.pdf [file mmc1.pdf]

**Biophysical Journal, Volume 119**

**Supplemental Information**

**A Computational Analysis of the Factors Governing the Dynamics of  $\alpha 7$   
nAChR and Its Homologs**

**Alican Gulsevin, Jens Meiler, and Nicole A. Horenstein**

# Supporting Information

## Supporting Figures

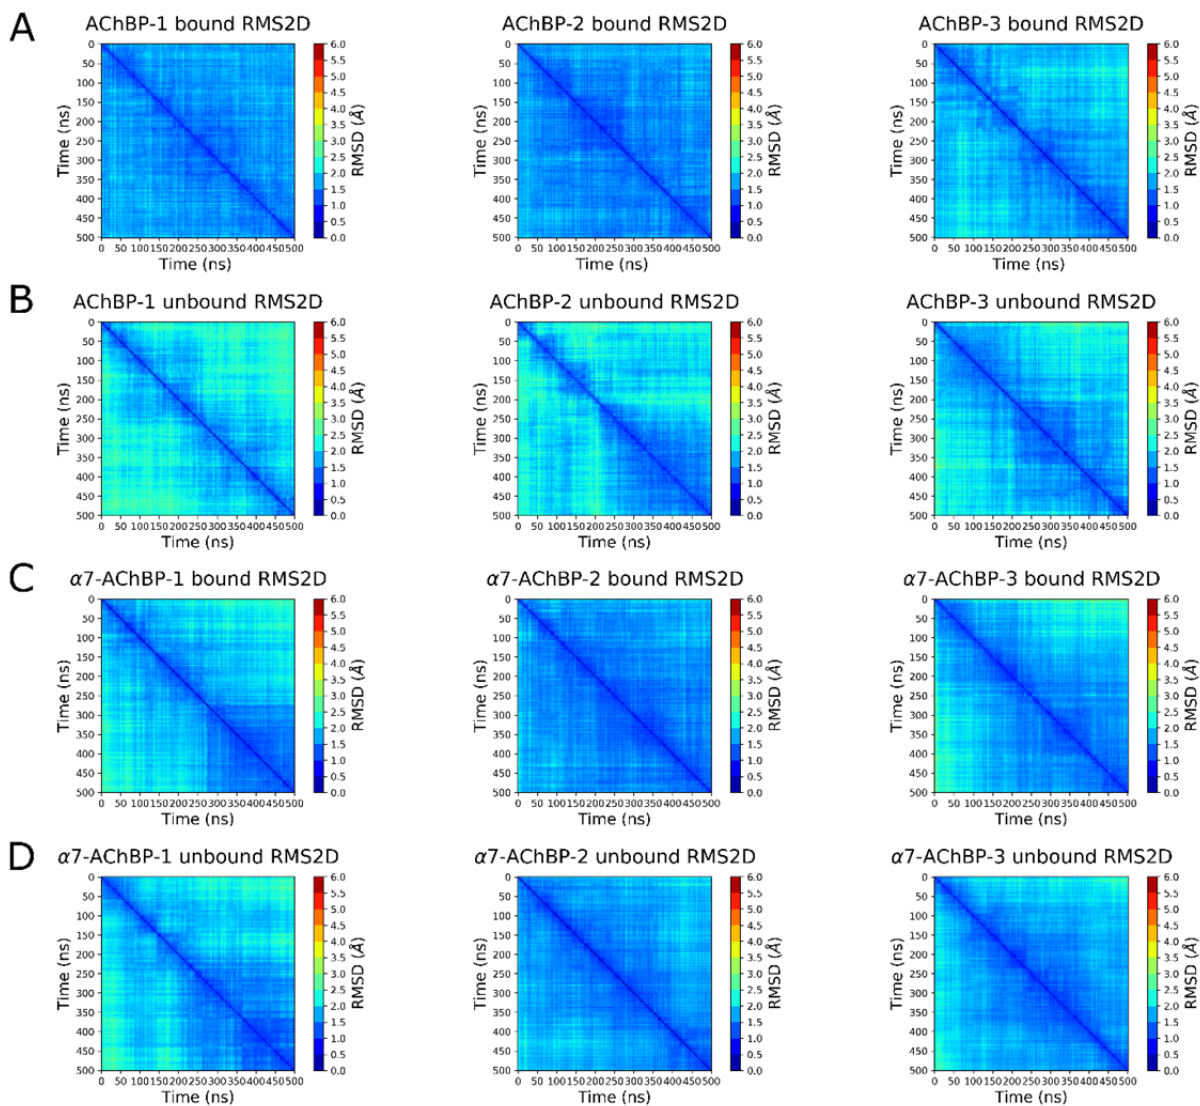

Supporting Figure 1: 2D RMSD plots calculated for the epibatidine-bound and unbound AChBP and  $\alpha$ 7-AChBP simulations.

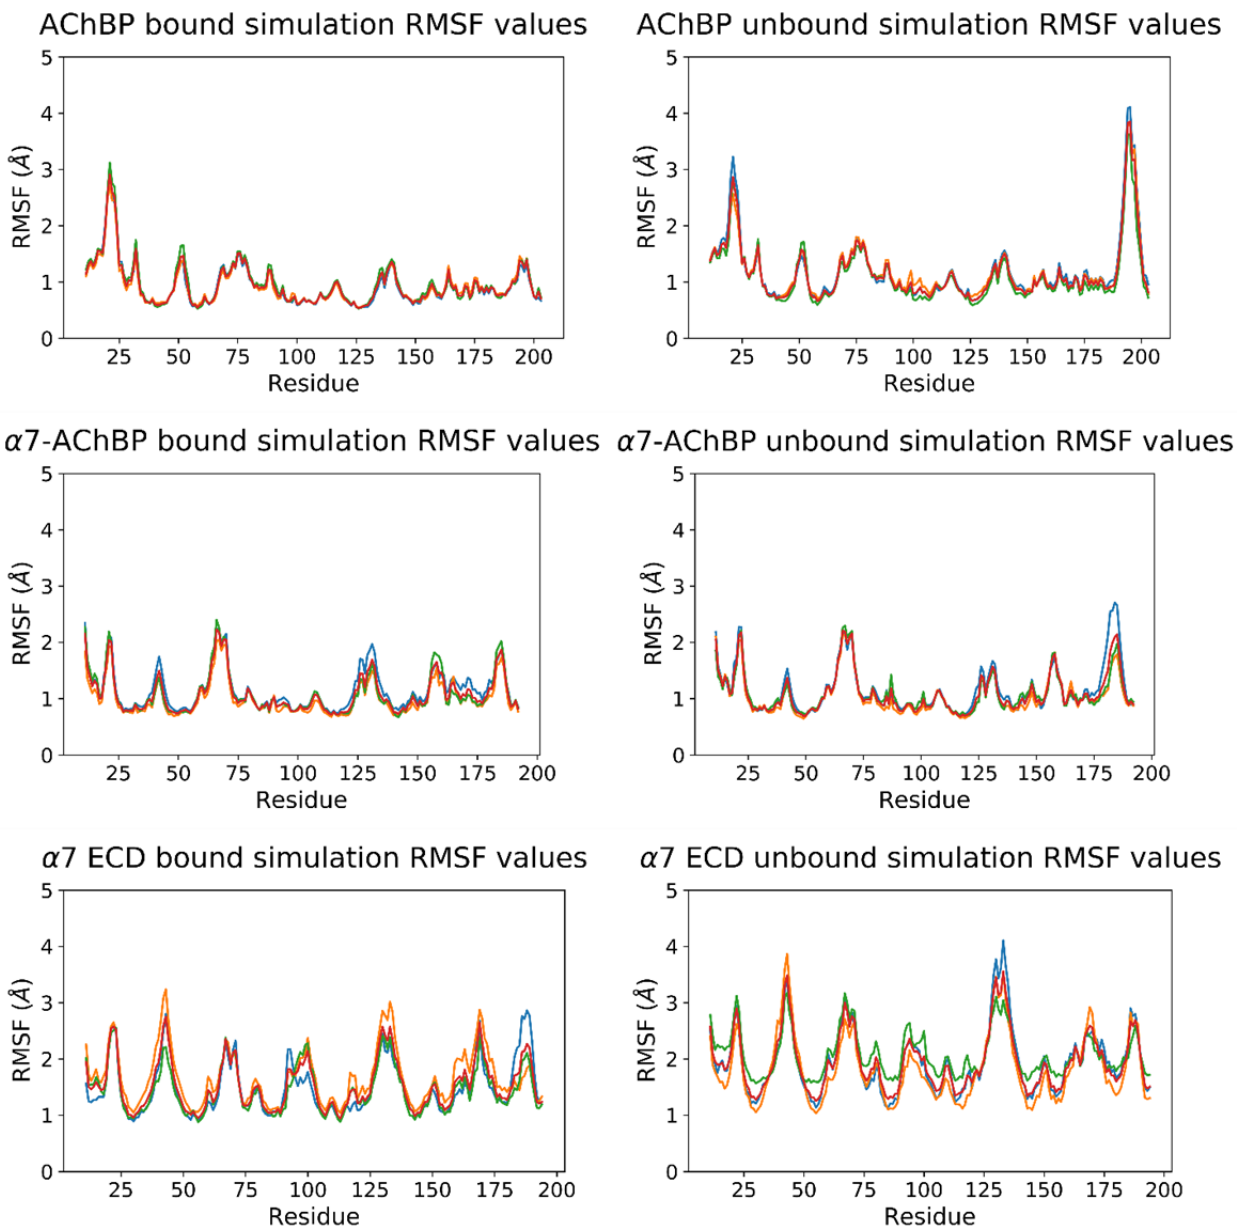

**Supporting Figure 2: The RMSF values calculated for each individual simulation and the average RMSF calculated from the individual values. Blue, orange, and green stand for the independent replica simulations, and red stands for the average RMSF calculated for the replica simulations. Top row: Epibatidine-bound (left) and unbound (right) AChBP, middle row: epibatidine-bound (left) and unbound (right)  $\alpha 7$ -AChBP, bottom row: epibatidine-bound (left) and unbound (right)  $\alpha 7$  ECD.**

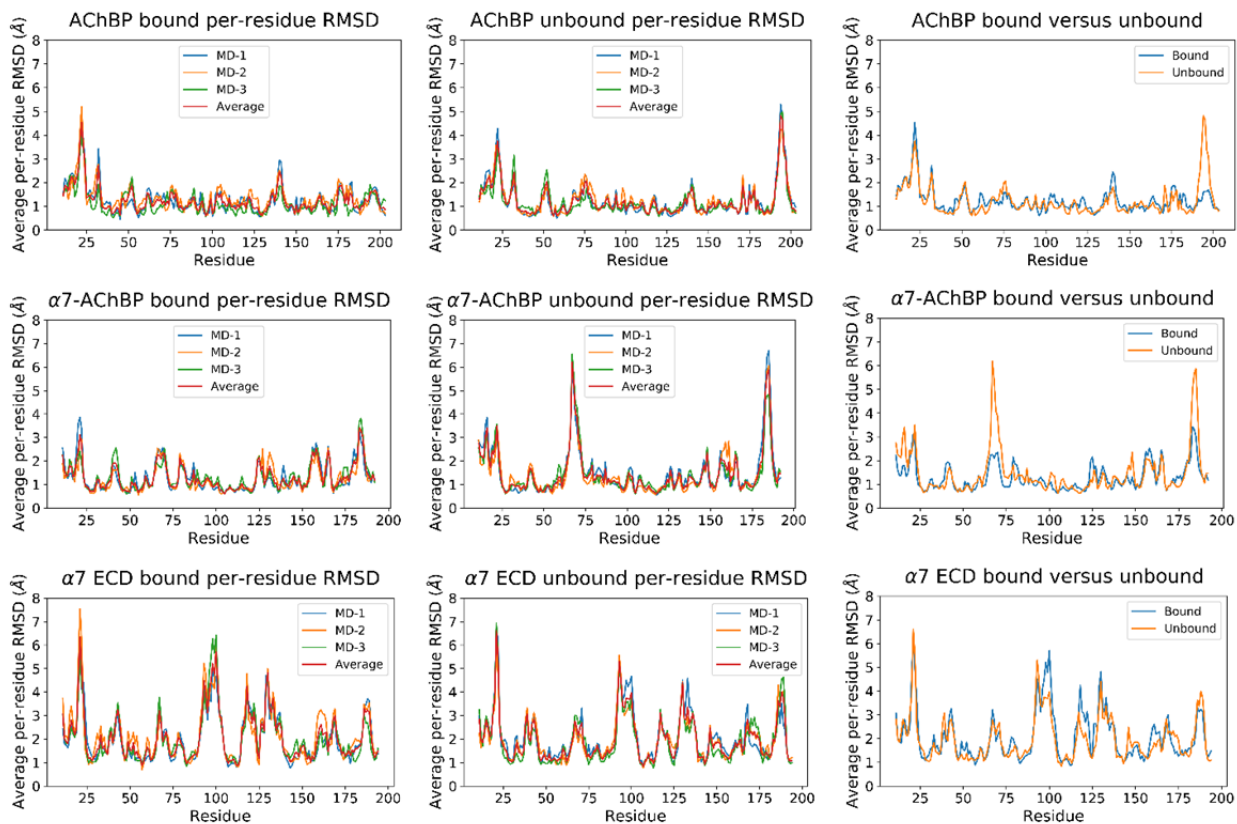

**Supporting Figure 3: Average per-residue RMSD values calculated for the replica simulations.**

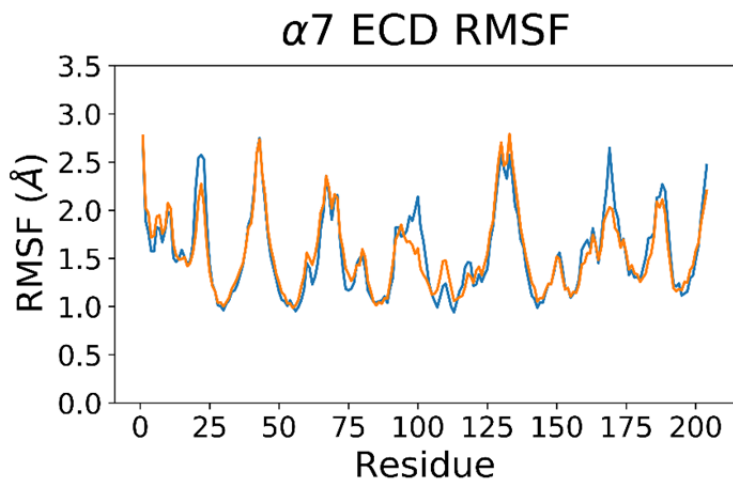

**Supporting Figure 4: Normalized α7 ECD epibatidine-bound (blue) and unbound (orange) RMSF values.**

|                  |                                                               |     |         |
|------------------|---------------------------------------------------------------|-----|---------|
| AChBP            | DDDKLHSQANLMRLKSDLFNRSMPYGPPTKDDPLTVTLGFTLQDIVKADSSTNEVDLVVY  | 60  | SRN 60  |
| $\alpha$ 7-AChBP | -----QRKLYKELVKNY-NPDVIPTQ-RDRPVTYFSLSLQIMDVDEKNQVVDVFW       | 51  |         |
| $\alpha$ 7 ECD   | -----QRKLYKELVKNY-NPLERPVANDSQPLTVYFSLSLQIMDVDEKNQVLTNIW      | 52  |         |
|                  |                                                               |     |         |
| AChBP            | EQQRWKLNSLMWDPNEYGNITDFRTSAADIWTPDITAYSST-RPVQVLSQIAVVTHDGS   | 119 | SRN 120 |
| $\alpha$ 7-AChBP | LQMSWTDHYLQWNVSEYPGVKQVSVPISSLWVPDLAAYNAISKPE-VLTPQLALVNSSGH  | 110 |         |
| $\alpha$ 7 ECD   | LQMSWTDHYLQWNVSEYPGVKTVRFPDGGQIWKPDILLYNSADERFDATFHTNVLVNSSGH | 112 |         |
|                  |                                                               |     |         |
| AChBP            | VMFIPAQRSLFMCDPTGV-DSEEGATCAVKFGSWVYSGFEIDLKTDTDQVDLSSYYASSK  | 178 | SRN 180 |
| $\alpha$ 7-AChBP | VQYLPsirQRFSCDVSGV-DTESGATCKLKFGSWTHHSRELDLQM--QEADISGYIPYSR  | 167 |         |
| $\alpha$ 7 ECD   | CQYLPpGIFKSSCYIDVRWFPFDVQhCKLKFGSWSYGGWSLDLQM--QEADISGYIPNGE  | 170 |         |
|                  |                                                               |     |         |
| AChBP            | YEILSATQTRVQVQHYSCCPEPYIDVNLVVKFRERR                          | 213 | SRN 215 |
| $\alpha$ 7-AChBP | FELVGVTQKRSErFYECCKEPYPDVTFTVTFRKKG                           | 202 |         |
| $\alpha$ 7 ECD   | WDLVGIPGKRSErFYECCKEPYPDVTFTVTMRRR-                           | 204 |         |

**Supporting Figure 5: Alignment of the AChBP,  $\alpha$ 7-AChBP, and  $\alpha$ 7 ECD sequences and the corresponding standard residue numbering (SRN).**

### Supporting Tables

**Supporting Table 1: Jensen-Shannon divergences calculated for the epibatidine-bound and unbound simulations of AChBP (top row),  $\alpha$ 7-AChBP (middle row), and  $\alpha$ 7 ECD simulations (bottom row).**

|                                         |             |             |             |  |                                           |             |             |             |
|-----------------------------------------|-------------|-------------|-------------|--|-------------------------------------------|-------------|-------------|-------------|
| <b>AChBP bound</b>                      |             |             |             |  | <b>AChBP unbound</b>                      |             |             |             |
| <b>Simulation</b>                       | <b>1</b>    | <b>2</b>    | <b>3</b>    |  | <b>Simulation</b>                         | <b>1</b>    | <b>2</b>    | <b>3</b>    |
| <b>1</b>                                | <b>0.00</b> | <b>0.05</b> | <b>0.44</b> |  | <b>1</b>                                  | <b>0.00</b> | <b>0.51</b> | <b>0.54</b> |
| <b>2</b>                                | <b>0.05</b> | <b>0.00</b> | <b>0.38</b> |  | <b>2</b>                                  | <b>0.51</b> | <b>0.00</b> | <b>0.61</b> |
| <b>3</b>                                | <b>0.44</b> | <b>0.38</b> | <b>0.00</b> |  | <b>3</b>                                  | <b>0.54</b> | <b>0.61</b> | <b>0.00</b> |
|                                         |             |             |             |  |                                           |             |             |             |
| <b><math>\alpha</math>7-AChBP bound</b> |             |             |             |  | <b><math>\alpha</math>7-AChBP unbound</b> |             |             |             |
| <b>Simulation</b>                       | <b>1</b>    | <b>2</b>    | <b>3</b>    |  | <b>Simulation</b>                         | <b>1</b>    | <b>2</b>    | <b>3</b>    |
| <b>1</b>                                | <b>0.00</b> | <b>0.56</b> | <b>0.64</b> |  | <b>1</b>                                  | <b>0.00</b> | <b>0.59</b> | <b>0.53</b> |
| <b>2</b>                                | <b>0.56</b> | <b>0.00</b> | <b>0.65</b> |  | <b>2</b>                                  | <b>0.59</b> | <b>0.00</b> | <b>0.50</b> |
| <b>3</b>                                | <b>0.64</b> | <b>0.65</b> | <b>0.00</b> |  | <b>3</b>                                  | <b>0.53</b> | <b>0.50</b> | <b>0.00</b> |
|                                         |             |             |             |  |                                           |             |             |             |

| $\alpha 7$<br>bound | ECD  |      |      |  | $\alpha 7$<br>unbound | ECD  |      |      |
|---------------------|------|------|------|--|-----------------------|------|------|------|
| Simulation          | 1    | 2    | 3    |  | Simulation            | 1    | 2    | 3    |
| 1                   | 0.00 | 0.64 | 0.65 |  | 1                     | 0.00 | 0.59 | 0.63 |
| 2                   | 0.64 | 0.00 | 0.61 |  | 2                     | 0.59 | 0.00 | 0.57 |
| 3                   | 0.65 | 0.61 | 0.00 |  | 3                     | 0.63 | 0.57 | 0.00 |

Supporting Table 2: The C-loop opening distances calculated for the epibatidine-bound and unbound AChBP,  $\alpha 7$ -AChBP, and  $\alpha 7$  ECD simulations. Each distance was calculated as the  $\alpha$ -carbon distances between the positive and negative face residues C195 and I123 for AChBP, C184 and L114 for  $\alpha 7$ -AChBP, and C190 and L119 for  $\alpha 7$  ECD. All units are in Angstroms.

| Interface | AChBP-1<br>bound             | AChBP-2<br>bound             | AChBP-3<br>bound             | AChBP-1<br>unbound             | AChBP-2<br>unbound             | AChBP-3<br>unbound             |
|-----------|------------------------------|------------------------------|------------------------------|--------------------------------|--------------------------------|--------------------------------|
| AB        | 9.1                          | 9.2                          | 9.7                          | 16.2                           | 17.4                           | 9.6                            |
| BC        | 9.1                          | 9.3                          | 8.9                          | 16.6                           | 9.2                            | 18.4                           |
| CD        | 9.3                          | 9.0                          | 9.8                          | 16.6                           | 13.7                           | 8.2                            |
| DE        | 9.0                          | 9.2                          | 9.1                          | 14.3                           | 7.7                            | 11.7                           |
| EA        | 10.5                         | 10.5                         | 9.2                          | 8.1                            | 15.3                           | 8.5                            |
|           |                              |                              |                              |                                |                                |                                |
| Interface | $\alpha 7$ -AChBP-1<br>bound | $\alpha 7$ -AChBP-2<br>bound | $\alpha 7$ -AChBP-3<br>bound | $\alpha 7$ -AChBP-1<br>unbound | $\alpha 7$ -AChBP-2<br>unbound | $\alpha 7$ -AChBP-3<br>unbound |
| AB        | 12.8                         | 14.1                         | 18.1                         | 10.9                           | 9.9                            | 11.6                           |
| BC        | 9.7                          | 8.0                          | 11.9                         | 13.0                           | 13.5                           | 7.5                            |
| CD        | 10.7                         | 12.5                         | 7.2                          | 10.8                           | 13.8                           | 11.3                           |
| DE        | 13.9                         | 11.3                         | 9.3                          | 12.2                           | 10.1                           | 13.0                           |
| EA        | 10.7                         | 9.8                          | 11.7                         | 19.8                           | 11.3                           | 9.9                            |
|           |                              |                              |                              |                                |                                |                                |

| Interface | $\alpha 7$ ECD-1<br>bound | $\alpha 7$ ECD-2<br>bound | $\alpha 7$ ECD-3<br>bound | $\alpha 7$ ECD-1<br>unbound | $\alpha 7$ ECD-2<br>unbound | $\alpha 7$ ECD-3<br>unbound |
|-----------|---------------------------|---------------------------|---------------------------|-----------------------------|-----------------------------|-----------------------------|
| <b>AB</b> | 20.2                      | 8.2                       | 15.7                      | 10.5                        | 7.4                         | 8.9                         |
| <b>BC</b> | 12.4                      | 10.6                      | 10.8                      | 8.4                         | 8.4                         | 8.8                         |
| <b>CD</b> | 9.5                       | 11.3                      | 10.1                      | 16.7                        | 8.0                         | 11.8                        |
| <b>DE</b> | 8.5                       | 8.4                       | 13.1                      | 13.4                        | 8.5                         | 8.4                         |
| <b>EA</b> | 12.6                      | 11.8                      | 11.4                      | 8.4                         | 8.8                         | 5.8                         |

**Supporting Table 3: Sequences of the regions that showed a large RMSF difference between  $\alpha 7$  ECD and the other two proteins. Green color indicates identical residues, orange color indicates similar residues, and red color indicates gaps and different residues.**

|                           |   |   |   |   |   |   |   |   |   |
|---------------------------|---|---|---|---|---|---|---|---|---|
| $\alpha 7$ -AChBP 38-46   | D | V | D | E | K | N | Q | V | V |
| $\alpha 7$ 42-50          | D | V | D | E | K | N | Q | V | L |
|                           |   |   |   |   |   |   |   |   |   |
| $\alpha 7$ -AChBP 164-169 | P | Y | S | R | F | E |   |   |   |
| $\alpha 7$ 170-175        | P | N | G | E | W | D |   |   |   |
|                           |   |   |   |   |   |   |   |   |   |
| $\alpha 7$ -AChBP 91-99   | A | I | S | K | P | E | - | V | L |
| $\alpha 7$ 95-104         | S | A | D | E | R | F | D | A | T |
|                           |   |   |   |   |   |   |   |   |   |
| $\alpha 7$ -AChBP 127-130 | G | V | - | D | T |   |   |   |   |
| $\alpha 7$ 132-136        | V | R | W | F | P |   |   |   |   |
|                           |   |   |   |   |   |   |   |   |   |
| AChBP 74-80               | P | N | E | Y | G | N | I |   |   |
| $\alpha 7$ -AChBP 65-71   | V | S | E | Y | P | G | V |   |   |
